# Supplementary material for: Mulberry-derived postbiotics alleviate LPS-induced intestinal inflammation and modulate gut microbiota dysbiosis
Source: Royal Society of Chemistry journal article supplement (doi:10.1039/d4fo05503a), 2025-01-01
Supplement: d4fo05503a1.pdf [file d4fo05503a1.pdf]

# Mulberry-derived Postbiotics Alleviates LPS-induced Intestinal Inflammation and Modulate Gut Microbiota Dysbiosis

Zaheer Abbas <sup>1</sup>, Baseer Ahmad <sup>2</sup>, Yucui Tong <sup>1</sup>, Zhang Jing <sup>1</sup>, Shuang Wu <sup>1</sup>, Junyong Wang <sup>1</sup>, Zhenzhen Li <sup>1</sup>, Tianqi Liu <sup>1</sup>, Yicong Liu <sup>1</sup>, Xubiao Wei <sup>1</sup>, and Dayong Si <sup>1\*</sup>, and Rijun Zhang <sup>1\*</sup>

<sup>1</sup> State Key Laboratory of Animal Nutrition and Feeding, College of Animal Science and Technology, China Agricultural University, 100193, Beijing, China; [zaheerabbas@cau.edu.cn](mailto:zaheerabbas@cau.edu.cn)

<sup>2</sup> Faculty of Veterinary and Animal Science, Muhammad Nawaz Sharif University of Agriculture, Multan, 25000, Pakistan.

\* Correspondence: [dayong@cau.edu.cn](mailto:dayong@cau.edu.cn), [rjzhang@cau.edu.cn](mailto:rjzhang@cau.edu.cn)

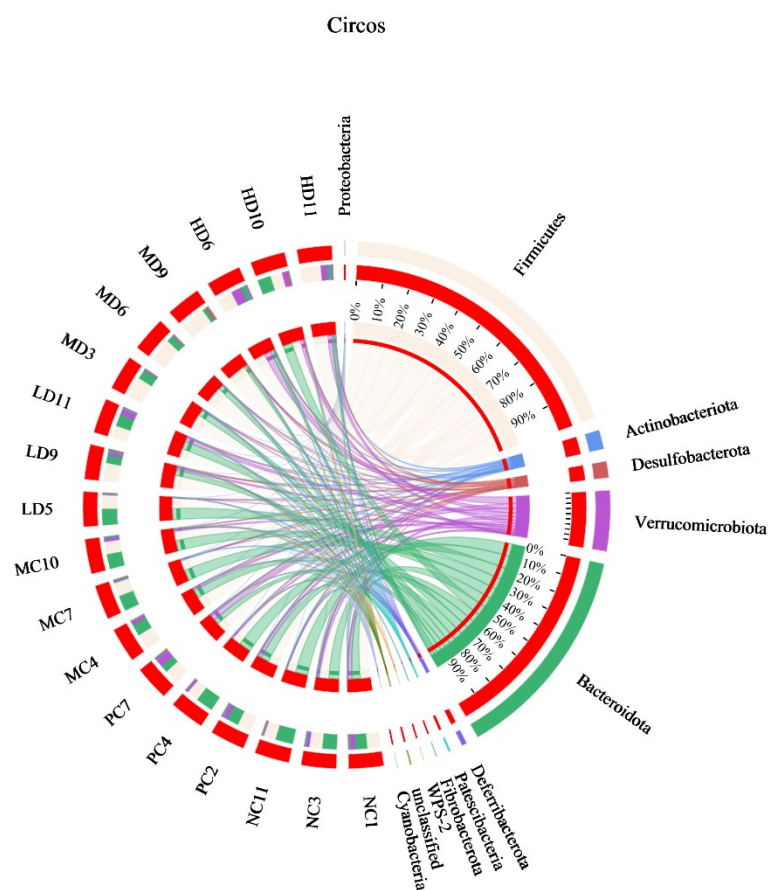

Fig. S1. Circos sample-species plots shows the distribution of microbial species present in different microbial samples. One side of the circle plot shows the samples and their groups, and the other side shows the main dominant species, showing the abundance distribution of different species in the samples through the connection of inner ribbons. The small semicircle (left half circle) represents the species composition in the sample, the color of the outer ribbon represents which group it comes from, the color of the inner ribbon represents the species, and the length represents the relative abundance of the species in the corresponding sample. The large semicircle (right half circle) represents the distribution proportion of species in different samples at this taxonomic level, the outer ribbon represents the species, the inner ribbon color represents different groups, and the length represents the distribution proportion of the sample in a certain species.

Table S1 shows the relative abundance of the top gut microbiota on the phylum, family and genus level in each sample.

| Relative abundance (%)   | NC        | PC        | MC        | LD        | MD         | HD        |
|--------------------------|-----------|-----------|-----------|-----------|------------|-----------|
| <b>Phylum</b>            |           |           |           |           |            |           |
| Firmicutes               | 0.40±0.02 | 0.42±0.04 | 0.43±0.06 | 0.46±0.09 | 0.72±0.09  | 0.49±0.13 |
| Bacteroidetes            | 0.46±0.09 | 0.38±0.16 | 0.44±0.06 | 0.38±0.13 | 0.20±0.09  | 0.20±0.13 |
| <b>Family</b>            |           |           |           |           |            |           |
| Muribaculaceae           | 0.39±0.05 | 0.37±0.14 | 0.40±0.07 | 0.37±0.13 | 0.18±0.08  | 0.19±0.18 |
| Lactobacillaceae         | 0.15±0.05 | 0.09±0.02 | 0.17±0.12 | 0.21±0.06 | 0.34±0.17  | 0.17±0.13 |
| Lachnospiraceae          | 0.12±0.01 | 0.23±0.06 | 0.13±0.02 | 0.20±0.15 | 0.16±0.10  | 0.16±0.11 |
| <b>Genus</b>             |           |           |           |           |            |           |
| norank_f__Muribaculaceae | 0.39±0.05 | 0.36±0.14 | 0.40±0.06 | 0.36±0.17 | 0.18±0.08  | 0.19±0.18 |
| Lactobacillus            | 0.15±0.05 | 0.09±0.02 | 0.17±0.12 | 0.21±0.06 | 0.34±0.17  | 0.17±0.13 |
| Akkermansia              | 0.07±0.07 | 0.13±0.07 | 0.05±0.03 | 0.11±0.04 | 0.01±0.008 | 0.21±0.09 |
| Lachnospiraceae_NK4A136  | 0.06±0.01 | 0.13±0.03 | 0.57±0.01 | 0.09±0.09 | 0.09±0.04  | 0.07±0.09 |
